# Supplementary material for: Clinical Impact of Electronic Monitoring Devices of Inhalers in Adults with Asthma or COPD: A Systematic Review and Meta-Analysis
Source: Pharmaceuticals (Basel). 2023 Mar 8;16(3):414. doi: 10.3390/ph16030414 (PMC10055893; doi:10.3390/ph16030414)
Supplement: Supplementary file 1 [file pharmaceuticals-16-00414-s001.zip]

Archive with 4 entries (4 files):
- PRESS 2015 Guideline Evidence-Based Checklist.pdf
- PRISMA_checklist.pdf
- Supplement 1.pdf
- supplement 2.pdf
